# Supplementary material
Source: Springer Nature journal article supplement (https://www.springermedizin.de/resource/supplementary/12943_2010_709_MOESM9_ESM.pdf/9554632)

T98G TW

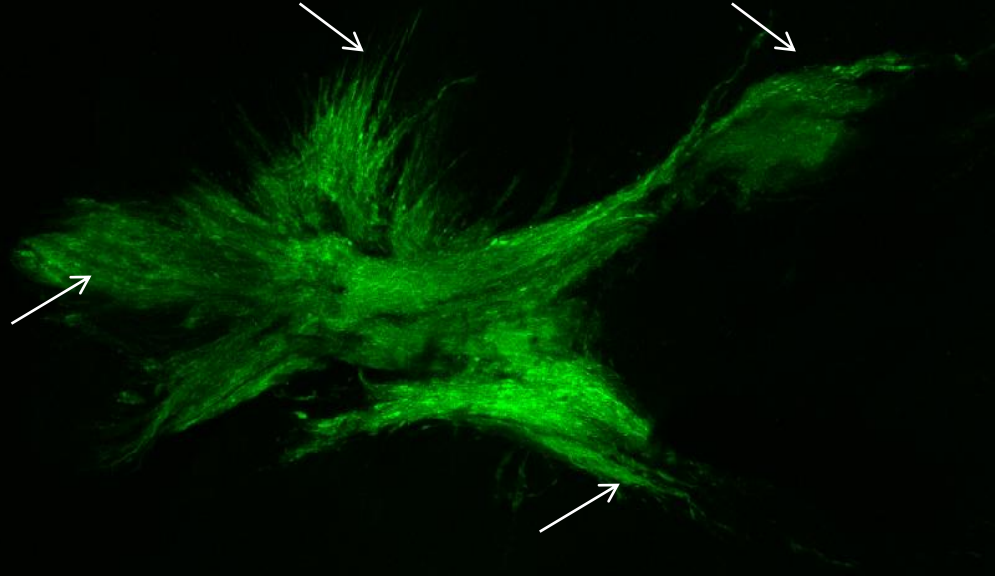

T98G Ctrl

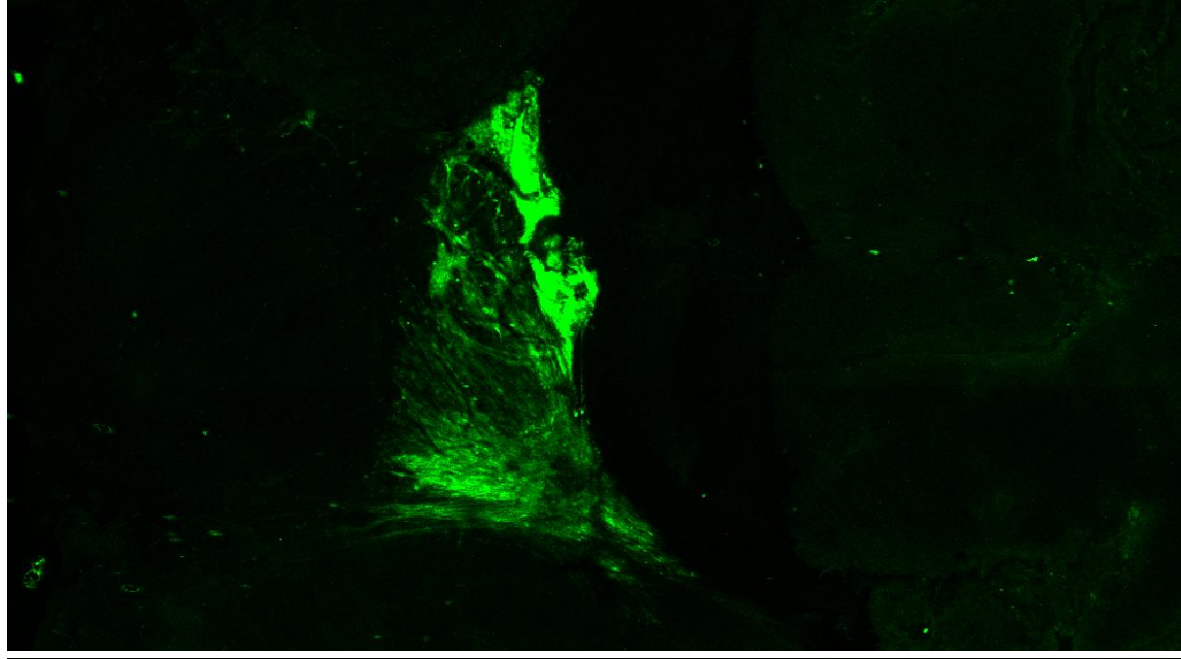

Supplement: MOESM9 [file 9554632]
